# Supplementary material for: Re-Emergence and Spread of Haemorrhagic Septicaemia in Germany: The Wolf as a Vector?
Source: MDPI journal article supplement (doi:10.3390/microorganisms9091999), 2021-09-21
Supplement: s1 [file s1]

**Supplementary Table S4:** Reference sequences and description of virulence-associated genes, capsular and lipopolysaccharide biosynthesis genes that were used for *in silico* screening of *P. multocida* ST122<sup>RIRDC</sup> genomes

| Gene category and name               | Description                                                                                           | GenBank accession no. of reference sequence | Reference strain       |
|--------------------------------------|-------------------------------------------------------------------------------------------------------|---------------------------------------------|------------------------|
| <b>Biosynthesis of capsule</b>       |                                                                                                       |                                             |                        |
| <i>hyaD-hyaC</i>                     | Specific genes of capsular type A                                                                     | CP003022.1:910400- 914575                   | <i>Pm</i> 36950        |
| <i>bcbD</i>                          | Specific genes of capsular type B                                                                     | AF169324.1:17690-16422                      | M-1404                 |
| <i>dcbF</i>                          | Specific genes of capsular type D                                                                     | AF302465.1:2892-4397                        | P934                   |
| <i>ecbJ</i>                          | Specific genes of capsular type E                                                                     | AF302466.1:3246-5363                        | P1234                  |
| <i>fcB</i>                           | Specific genes of capsular type F                                                                     | AY604234.1:1-3156                           | J-4103                 |
| <b>Biosynthesis of LPS</b>           |                                                                                                       |                                             |                        |
| locus_tag "NCTC10382_00021"          | LPS genotype 1 (carboxylate/amino acid/amine transporter)                                             | LS483473.1:16183-17091                      | NCTC 10382             |
| locus_tag "NCTC10323_00016"          | LPS genotype 2 (Glycosyl transferase family 2)                                                        | LR134532.1:12164-13006                      | NCTC 10323             |
| locus_tag "ATO47_06115"              | LPS genotype 3 (beta-1,4 galactosyltransferase)                                                       | CP013291.1:1387020-1386238                  | ATO47_06115            |
| <i>latB</i>                          | LPS genotype 4 (putative acyltransferase 3)                                                           | KM670447.1:3565-1715                        | P2192                  |
| <i>rmlC</i>                          | LPS genotype 5 (putative dTDP-4-dehydrorhamnose 3,5-epimerase)                                        | JN571483.1:13180-13722                      | P2095                  |
| <i>nctB</i>                          | LPS genotype 6 (putative beta-1,3 N-acetyl-glucosyltransferase)                                       | KJ689443.1:4447-3443                        | P1573                  |
| <i>ppgB</i>                          | LPS genotype 7 (biosynthesis of 1[(4 aminobutyl)amino]-3-hydroxy-1-oxopropan-2-yl hydrogen phosphate" | JX987238.1:3739-4788                        | P1591                  |
| <i>natF</i>                          | LPS genotype 8 (predicted1,4 N acetyl galactosamine transferase)                                      | KM670448.1:4920-5795                        | P2723                  |
| <b>Adhesins/Colonization factors</b> |                                                                                                       |                                             |                        |
| <i>ptfA</i>                          | Type 4 fimbriae                                                                                       | KP726888.1:1-435                            | P-1059<br>(ATCC 15742) |
| <i>fimA</i>                          | Fimbriae (from Pm70)                                                                                  | KP660167.1:1-1125                           | UNMSM                  |
| <i>hsf-1</i>                         | Autotransporter adhesion (from Pm70)                                                                  | AE004439.1: 840331-832193                   | Pm70                   |
| <i>hsf-2</i>                         | Autotransporter adhesion (from Pm70)                                                                  | AE004439.1:1775628-1779527                  | Pm70                   |
| <i>pfhB-igB</i>                      | Filamentous hemagglutinin and putative immunoglobulin binding protein                                 | AY035342.1:9393-11444                       | 232                    |
| <i>pfhB1</i>                         | Filamentous hemagglutinin (FhaB) protein                                                              | AE004439.1:64167-72014                      | Pm70                   |

| Gene category and name                                        | Description                                                      | GenBank accession no. of reference sequence | Reference strain                   |
|---------------------------------------------------------------|------------------------------------------------------------------|---------------------------------------------|------------------------------------|
| <i>pflB2</i>                                                  | Filamentous hemagglutinin (FhaB) protein                         | ALBZ01000007.1:1250-5997                    | P52VAC                             |
| <i>tad</i> locus ( <i>flp1-flp2-tadV-rcpCAB-tadZABCDEFG</i> ) | Non-specific tight adherence protein locus (colonization island) | CP003328.1:946117-957784                    | PmHB03                             |
| <b>Toxin</b>                                                  |                                                                  |                                             |                                    |
| <i>toxA</i>                                                   | G-protein deamidating <i>P. multocida</i> toxin                  | AY864768.1:22-3879                          | <i>Pm</i> clone HN-13              |
| <b>Iron regulation/acquisition</b>                            |                                                                  |                                             |                                    |
| <i>afuCBA</i>                                                 | Afu iron transport system                                        | AE004439.1:1124243-1130644                  | Pm70                               |
| <i>ccmABCDE</i>                                               | Proteins involved in posttranslational attachment of heme        | AE004439.1:5567-10363                       | Pm70                               |
| <i>exbB</i>                                                   | Accessory protein Ton-dependent transport of iron compound       | AF468825.1:531-989                          | PM25                               |
| <i>exbD</i>                                                   | Accessory protein Ton-dependent transport of iron compound       | AF468825.1:998-1387                         | PM25                               |
| <i>tonB</i>                                                   | Proteins forming the TonB-dependent transporter                  | AF468825.1:1384-2154                        | PM25                               |
| <i>fecB</i>                                                   | Iron-dicitrate transporter substrate-binding subunit             | CP014618.1:1113112-1114008                  | Pm-3                               |
| <i>fecC</i>                                                   | Iron-dicitrate transporter permease subunit                      | CP014618.1:1114008-1114991                  | Pm-3                               |
| <i>fecD</i>                                                   | Iron-dicitrate transporter subunit FecD                          | CP014618.1:1114991-1115983                  | Pm-3                               |
| <i>fecE</i>                                                   | Ferric citrate ABC transporter ATP-binding protein               | CP014618.1:1115983-1116756                  | Pm-3                               |
| <i>fbpABC</i>                                                 | Ferric binding proteins                                          | AE004439.1:52929-56773                      | Pm70                               |
| <i>fur</i>                                                    | Ferric uptake regulation protein                                 | KP659942.1:1-441                            | UNMSM                              |
| <i>hgbA</i>                                                   | Putative TonB-dependent receptor                                 | AF237932.1:1-2904                           | Not specified                      |
| <i>hgbB</i>                                                   | Putative hemoglobin-iron uptake protein                          | KX832982.1:1-755                            | Pm04                               |
| <i>thpA</i>                                                   | Transferrin-binding protein A                                    | DQ782801.1:1-2334                           | Pm D:1                             |
| <b>Extracellular enzymes</b>                                  |                                                                  |                                             |                                    |
| <i>nanB</i>                                                   | Sialidase NanB                                                   | AF274868.1:77-3289                          | 86-1913                            |
| <i>nanH</i>                                                   | Sialidase NanH                                                   | AF274869.1:90-2333                          | 86-1913                            |
| <i>neuA</i>                                                   | CMP-sialic acid synthetase                                       | AE004439.1:209243-209914                    | Pm70                               |
| <i>nanATEK</i>                                                | Structural proteins involved in sialic acid catabolism           | CP008918.1:655947-659112                    | ATCC 43137                         |
| <i>nanR</i>                                                   | Regulatory protein involved in sialic acid catabolism            | UGSY01000001.1:313035-314003                | <i>P. testudinis</i><br>NCTX 12150 |
| <i>pmHAS</i>                                                  | Hyaluronan synthase                                              | AF036004.2:1-2919                           | P-1059<br>(ATCC 15742)             |

| Gene category and name                    | Description                                                                                             | GenBank accession no. of reference sequence | Reference strain |
|-------------------------------------------|---------------------------------------------------------------------------------------------------------|---------------------------------------------|------------------|
| <i>siaPT-nanM</i>                         | Proteins that form the TRAP system required for sialic acid uptake; NanM: N-acetylneuraminate epimerase | CP008918.1:660846-665052                    | ATCC 43137       |
| <b>Oxidative stress</b>                   |                                                                                                         |                                             |                  |
| <i>sodA</i>                               | Superoxide dismutase A                                                                                  | AE004439.1:185-829                          | Pm70             |
| <i>sodC</i>                               | Superoxide dismutase C                                                                                  | AE004439.1:2190308-2190868                  | Pm70             |
| <b>Secretion systems</b>                  |                                                                                                         |                                             |                  |
| locus_tag "DR93_1687"                     | Type II secretion system                                                                                | NZ_CP008918.1:1761952-1761098               | ATCC 43137       |
| locus_tag "DR93_1692"                     | Type II and type III secretion system                                                                   | NZ_CP008918.1:1767124-1765769               | ATCC 43137       |
| <b>Outer membrane proteins/protectins</b> |                                                                                                         |                                             |                  |
| <i>ompA</i>                               | Outer membrane protein A                                                                                | KU342632.1:1-1077                           | 768              |
| <i>ompH</i>                               | Outer membrane protein H                                                                                | JX473022.1:1-1023                           | XJNKY-12-YF1     |
| <i>oma87</i>                              | Outer membrane protein 87                                                                               | U60439.1:345-2714                           | PBA100           |
| <i>plpB</i>                               | Pasteurella lipoprotein B                                                                               | KP659994.1:1-831                            | UNMSM            |
